# Supplementary material for: Identification of dredged sediment-derived soils in the alluvial plains of the Leie and the Upper and Sea Scheldt rivers (Belgium) based on physico-chemical soil propertiesElectronic supplementary information (ESI) available: summary statistics for physico-chemical properties of alluvial plain soil and dredged sediment landfills, C/S ratios from the literature and C/S, C/P and C/N ratios from topsoil layers. See http://www.rsc.org/suppdata/em/b1/b108881e/
Source: Royal Society of Chemistry journal article supplement (doi:10.1039/b108881e), 2002-03-04
Supplement: tables_figures.pdf [file tables_figures.pdf]

# Identification of dredged sediment-derived soils in the alluvial plains of the Leie, the Upper and Sea Scheldt river (Belgium) based on physico-chemical soil properties

Bart Vandecasteele<sup>\*</sup>, Bruno De Vos & Filip M.G. Tack

\* E-mail: [Bart.Vandecasteele@lin.vlaanderen.be](mailto:Bart.Vandecasteele@lin.vlaanderen.be)

**Table 1S.** Summary statistics for the physico-chemical properties of the alluvial plain soil ( $n = 104$ )

|                                   | Mean | Stdev. | Median | Min. | 5th Perc. | 95th Perc. | Max. |
|-----------------------------------|------|--------|--------|------|-----------|------------|------|
| <b>Cd (mg kg<sup>-1</sup> DM)</b> | 0.8  | 0.5    | 0.6    | 0.2  | 0.4       | 2.0        | 2.3  |
| <b>Cr (mg kg<sup>-1</sup> DM)</b> | 66   | 25     | 66     | 17   | 26        | 112        | 126  |
| <b>Cu (mg kg<sup>-1</sup> DM)</b> | 22   | 12     | 20     | 5    | 8         | 45         | 78   |
| <b>Ni (mg kg<sup>-1</sup> DM)</b> | 23   | 10     | 22     | 4    | 8         | 39         | 54   |
| <b>Pb (mg kg<sup>-1</sup> DM)</b> | 49   | 30     | 43     | 7    | 17        | 97         | 192  |
| <b>Zn (mg kg<sup>-1</sup> DM)</b> | 129  | 69     | 111    | 38   | 52        | 245        | 441  |
| % clay                            | 22   | 8      | 22     | 7    | 8         | 37         | 42   |
| % silt                            | 45   | 16     | 44     | 13   | 17        | 68         | 73   |
| % sand                            | 33   | 22     | 31     | 0    | 1         | 74         | 79   |
| <b>P (g kg<sup>-1</sup> DM)</b>   | 0.9  | 0.3    | 0.9    | 0.2  | 0.5       | 1.6        | 2.1  |
| <b>S (g kg<sup>-1</sup> DM)</b>   | 0.7  | 0.4    | 0.6    | 0.2  | 0.2       | 1.4        | 1.7  |
| <b>N (g kg<sup>-1</sup> DM)</b>   | 3.8  | 1.7    | 3.7    | 0.1  | 1.3       | 6.8        | 8.3  |
| % CaCO <sub>3</sub>               | 1.9  | 1.7    | 1.4    | 0.0  | 0.1       | 5.5        | 7.4  |
| % OC                              | 3.2  | 1.5    | 3.1    | 0.8  | 1.1       | 5.7        | 7.8  |
| pH-H <sub>2</sub> O               | 6.9  | 0.8    | 6.9    | 4.6  | 5.8       | 8.0        | 8.2  |
| pH-CaCl <sub>2</sub>              | 6.2  | 0.8    | 6.2    | 3.9  | 5.2       | 7.3        | 7.6  |
| <b>EC (μS cm<sup>-1</sup>)</b>    | 167  | 73     | 166    | 34   | 61        | 291        | 403  |

**Table 2S.** Summary statistics for the physico-chemical properties of the known dredged sediment landfills ( $n = 102$ )

|                                   | <b>Mean</b> | <b>Stdev.</b> | <b>Median</b> | <b>Min.</b> | <b>5th Perc</b> | <b>95th Perc.</b> | <b>Max.</b> |
|-----------------------------------|-------------|---------------|---------------|-------------|-----------------|-------------------|-------------|
| <b>Cd (mg kg<sup>-1</sup> DM)</b> | 14.7        | 8.4           | 12.6          | 0.5         | 2.8             | 29.0              | 35.5        |
| <b>Cr (mg kg<sup>-1</sup> DM)</b> | 820         | 757           | 460           | 66          | 137             | 2298              | 2769        |
| <b>Cu (mg kg<sup>-1</sup> DM)</b> | 65          | 1009          | 153           | 5           | 62              | 297               | 362         |
| <b>Ni (mg kg<sup>-1</sup> DM)</b> | 42          | 15            | 41            | 12          | 17              | 68                | 83          |
| <b>Pb (mg kg<sup>-1</sup> DM)</b> | 292         | 158           | 249           | 48          | 98              | 570               | 916         |
| <b>Zn (mg kg<sup>-1</sup> DM)</b> | 1866        | 883           | 1758          | 255         | 571             | 3535              | 4224        |
| <b>% clay</b>                     | 36          | 12            | 37            | 11          | 15              | 57                | 62          |
| <b>% silt</b>                     | 48          | 9             | 50            | 22          | 30              | 58                | 67          |
| <b>% sand</b>                     | 16          | 16            | 11            | 0           | 1               | 52                | 64          |
| <b>P (g kg<sup>-1</sup> DM)</b>   | 3.9         | 1.6           | 3.7           | 1.2         | 1.7             | 6.6               | 7.1         |
| <b>S (g kg<sup>-1</sup> DM)</b>   | 3.6         | 2.5           | 2.8           | 0.7         | 1.0             | 8.0               | 13.6        |
| <b>N (g kg<sup>-1</sup> DM)</b>   | 3.9         | 1.4           | 3.8           | 1.6         | 1.9             | 5.8               | 12.4        |
| <b>% CaCO<sub>3</sub></b>         | 7.5         | 1.6           | 7.6           | 4.3         | 5.2             | 10.0              | 11.9        |
| <b>% OC</b>                       | 4.2         | 1.4           | 4.1           | 0.9         | 1.9             | 6.6               | 7.5         |
| <b>pH-H<sub>2</sub>O</b>          | 7.4         | 0.2           | 7.4           | 6.9         | 7.1             | 7.7               | 7.9         |
| <b>pH-CaCl<sub>2</sub></b>        | 7.2         | 0.2           | 7.2           | 6.6         | 6.8             | 7.5               | 7.6         |
| <b>EC (μS cm<sup>-1</sup>)</b>    | 1032        | 744           | 895           | 124         | 162             | 2234              | 2550        |

**Table 3S.** C/S ratios from literature

| <b>Location</b>                           | <b>Author</b> | <b>C/S ratio</b> |
|-------------------------------------------|---------------|------------------|
| pasture, Northern Ireland                 | (36)          | 69               |
| A-horizon under hardwood forest, Otto     | (37)          | 131              |
| A-horizon under hardwood forest, Otto     | (37)          | 145              |
| A-horizon under hardwood forest, Otto     | (37)          | 187              |
| non-polluted sediment, Otto               | (37)          | 60               |
| A-horizon under hardwood forest, Otto     | (37)          | 343              |
| A-horizon under hardwood forest, Otto     | (37)          | 225              |
| A-horizon under hardwood forest, Otto     | (37)          | 175              |
| arable land Schotland                     | (38)          | 54               |
| arable land Northtumberland               | (38)          | 63               |
| arable land Bedfordshire                  | (38)          | 49               |
| arable land Hertfordshire                 | (38)          | 62               |
| floodplain forest soil, 0-10 cm, Canada   | (39)          | 76               |
| upland forest soil, 0-10 cm, Canada       | (39)          | 42               |
| Sifton Bog, Canada                        | (40)          | 220              |
| Point Pelee Marsh, Canada                 | (40)          | 55               |
| pasture, 0-15 cm, Northtumberland         | (41)          | 74               |
| pasture, 0-15 cm, Northtumberland         | (41)          | 82               |
| pasture, 0-15 cm, Northtumberland         | (41)          | 94               |
| pasture, 0-15 cm, Northtumberland         | (41)          | 84               |
| pasture, 0-15 cm, Northtumberland         | (41)          | 116              |
| pasture, 0-15 cm, Northtumberland         | (41)          | 80               |
| non-polluted sediment (1), Ravenna        | (42)          | 14               |
| non-polluted sediment (2), Ravenna        | (42)          | 59               |
| non-polluted sediment (3), Ravenna        | (42)          | 207              |
| non-polluted sediment (4), Ravenna        | (42)          | 113              |
| non-polluted sediment (5), Ravenna        | (42)          | 124              |
| poll. river alluvium sediments, Louisiana | (43)          | 34               |
| polluted sediment (1), Ravenna            | (42)          | 11               |
| polluted sediment (2), Ravenna            | (42)          | 15               |
| polluted sediment (3), Ravenna            | (42)          | 6                |
| polluted sediment (4), Ravenna            | (42)          | 14               |
| polluted sediment (5), Ravenna            | (42)          | 16               |
| polluted sediment (6), Ravenna            | (42)          | 21               |
| polluted sediment (7), Ravenna            | (42)          | 58               |
| polluted sediment, Belgium                | (44)          | 3                |

36 J.S. Bailey, Y. Deng, R.V. Smith, *Chemosphere*, 2001, 42, 141-151.

37 D.B. Dail & J.W. Fitzgerald, *Soil Biol. Biochem.*, 1999, 31, 1395-1404.

- 38 F.J. Zhao, S.Y. Loke, A.R. Crosland and S.P. McGrath, *Soil Biol. Biochem.*, 1996, 28 (8), 1083-1087.
- 39 L.M. Bartel-Ortiz and M.B. David, *Can. J. For. Res.*, 1998, 18, 1006-1112.
- 40 E.R.C. Hornibrook, F.J. Longstaffe, W.S. Fyfe and Y. Bloom, *Geochem. J.*, 2000, 34, 237-245.
- 41 Z.L. He, A.G. O'Donnell and J.K. Syers, *Biol. Fertil. Soils*, 1997, 24, 421-428.
- 42 D. Fabbri, O. Felisatti, M. Lombardo, C. Trombini and I. Vassura, *Sci. Total environ.*, 1998, 213, 121-128.
- 43 A.A. Carbonell, J.D. Porthouse, C.K. Mulbah, R.D. DeLaune & W.H. Patrick Jr, *J. Environ. Qual.*, 1999, 28, 232-242.
- 44 F.M. Tack, F. Lapauw and M.G. Verloo, *Talanta*, 1997, 44, 2185-2192.

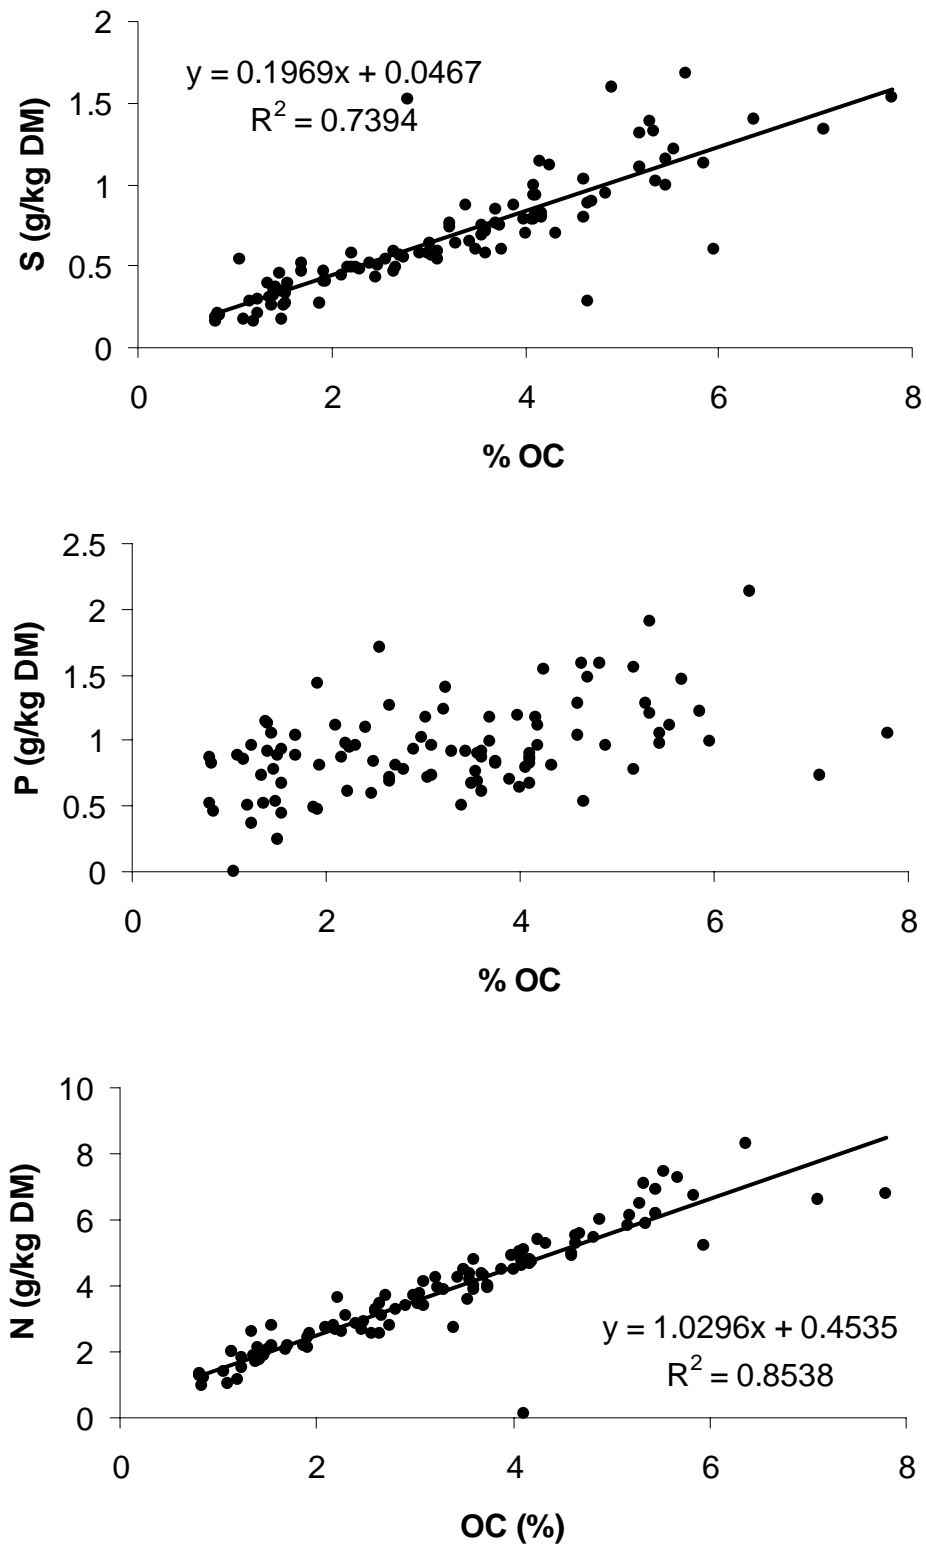

**Fig. 1S.** C/S, C/P and C/N ratio for the topsoil layers of 104 samples from the alluvial plains from the Upper and Sea scheldt and Leie river.
